# Supplementary material for: Integrating GWAS with bulk and single-cell RNA-sequencing reveals a role for LY86 in the anti-Candida host response
Source: PubMed Central journal article supplement (PMC7173933; doi:10.1371/journal.ppat.1008408), 2020-04-06

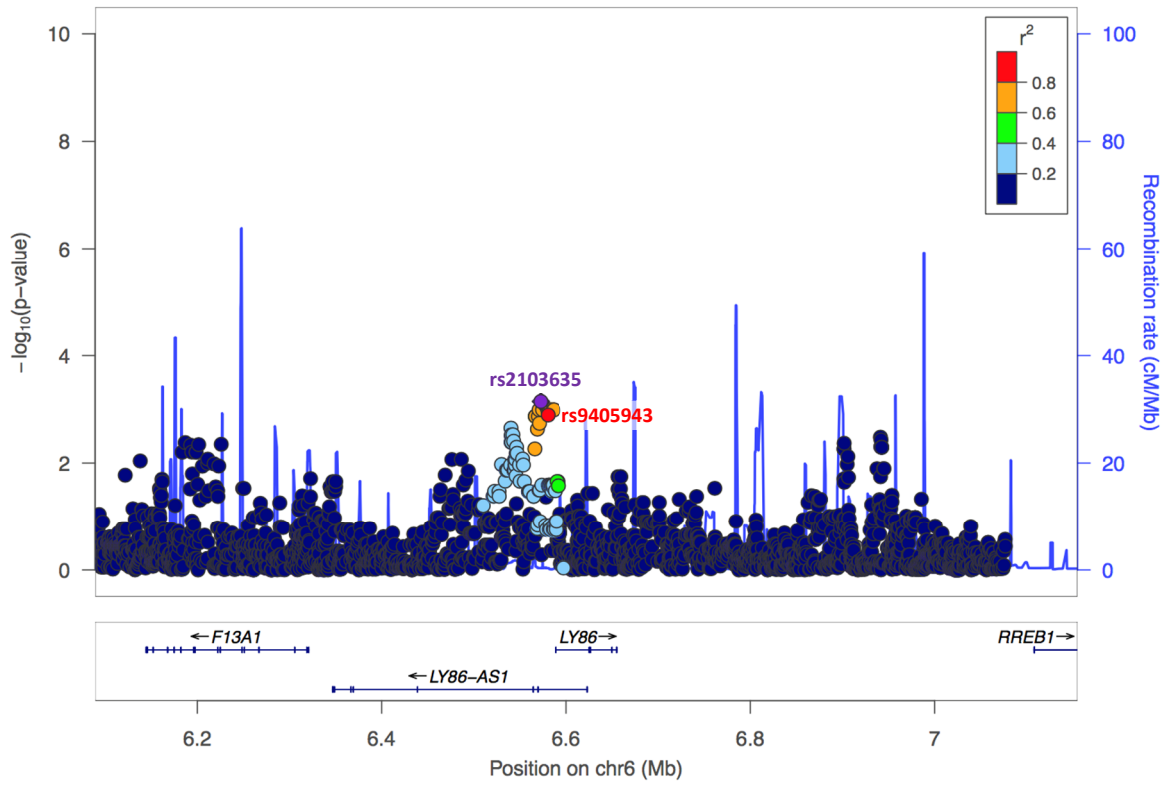

Supplement: ppat.1008408.s004.pdf [file ppat.1008408.s004.pdf]
